# Supplementary material
Source: PubMed Central journal article supplement (PMC4173078)

A.

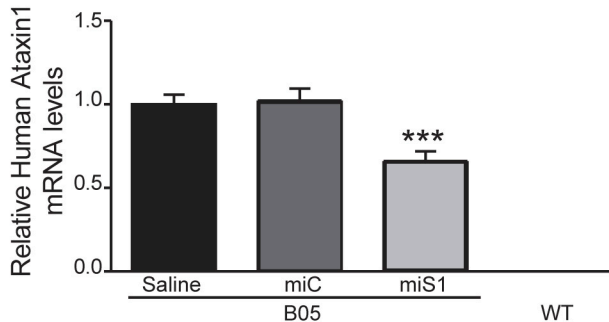

B.

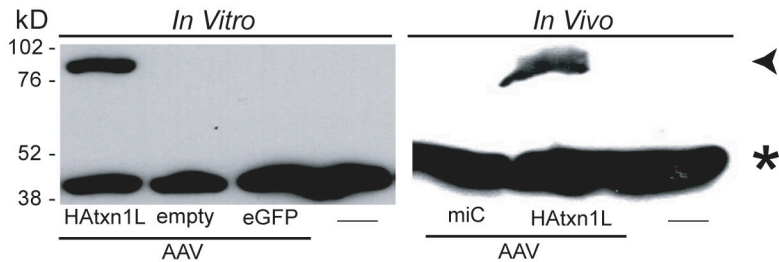

Supplement: NIHMS626945-supplement-Suppl_Figure_1.pdf [file NIHMS626945-supplement-Suppl_Figure_1.pdf]

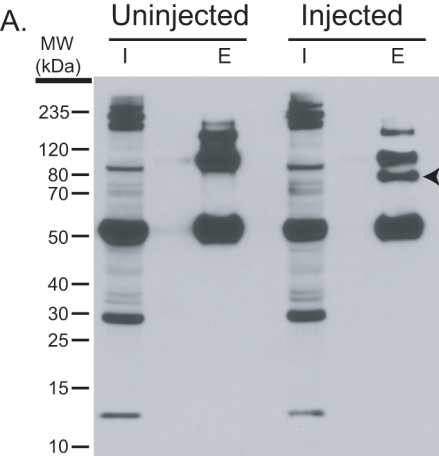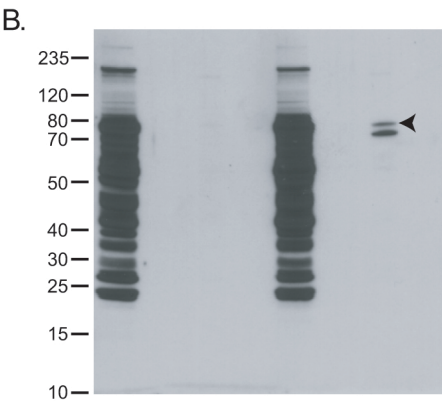

Supplement: NIHMS626945-supplement-Suppl_Figure_2.pdf [file NIHMS626945-supplement-Suppl_Figure_2.pdf]
